# Supplementary material for: Excess mortality for men and women above age 70 according to level of care during the first wave of COVID-19 pandemic in Sweden: A population-based study
Source: PubMed Central journal article supplement (PMC8454796; doi:10.1016/j.lanepe.2021.100072), 2021-03-17
Supplement: mmc3.pdf [file mmc3.pdf]

I agree to be included in the Acknowledgements of this article

“Excess mortality for men and women above age 70 according to level of care during the first wave of COVID-19 pandemic in Sweden: a population-based study”

A handwritten signature in black ink, appearing to read 'Enrique Acosta', written in a cursive style.

Enrique Acosta  
Rostock 02/18/2021
